# Supplementary material for: Tailoring base catalyzed synthesis of palm oil based alkyd resin through CuO nanoparticles
Source: Royal Society of Chemistry journal article supplement (doi:10.1039/c5ra19575f), 2015-01-01
Supplement: c5ra19575f1.pdf [file c5ra19575f1.pdf]

## NMR analysis

### Results and discussion section

Figure S1 shows  $^1\text{H-NMR}$  and  $^{13}\text{C-NMR}$  spectra of palm oil. The peaks at 0.87 and 1.25 ppm in  $^1\text{H-NMR}$  spectrum (Figure S1a) correspond to the terminal methyl groups ( $-\text{CH}_3$ ) and methylene groups ( $-\text{CH}_2-$ ) of fatty acid chains. The protons attached with carbon 3,  $-\text{CO}-\text{CH}_2-\text{CH}_2-$  was featured at 1.62 ppm<sup>1</sup>. The allylic protons of the fatty acid chain,  $-\text{CH}_2-\text{CH}=\text{C}-$  were appeared at 2.01 ppm<sup>2</sup> and the protons of the carbon next to the ester linkages,  $-\text{CO}-\text{CH}_2-$  appeared at 2.32 ppm. Moreover, peaks at 4.12-4.32 and 5.26-5.50 ppm are related to the protons of  $-\text{CH}_2-$  groups in glyceride unit and unsaturated carbon ( $-\text{CH}=\text{CH}-$ ), respectively. In the  $^{13}\text{C-NMR}$  (Figure S1b), the carbonyl groups ( $-\text{CO}-$ ) of the ester (palm oil) appeared at 173.10 ppm, whereas, the carbon-carbon double bonds ( $-\text{C}=\text{C}-$ ) of the oleic acid can be seen at 125–135 ppm. The glyceride carbons present in  $-\text{CH}_2-$  groups and central carbon can be observed at 62.1 and 68.9 ppm, respectively. In addition, peaks at 20-40 and 14.3 ppm correspond to the  $-\text{CH}_2-$  groups and the terminal  $-\text{CH}_3$  groups of fatty acid carbon<sup>1</sup>.

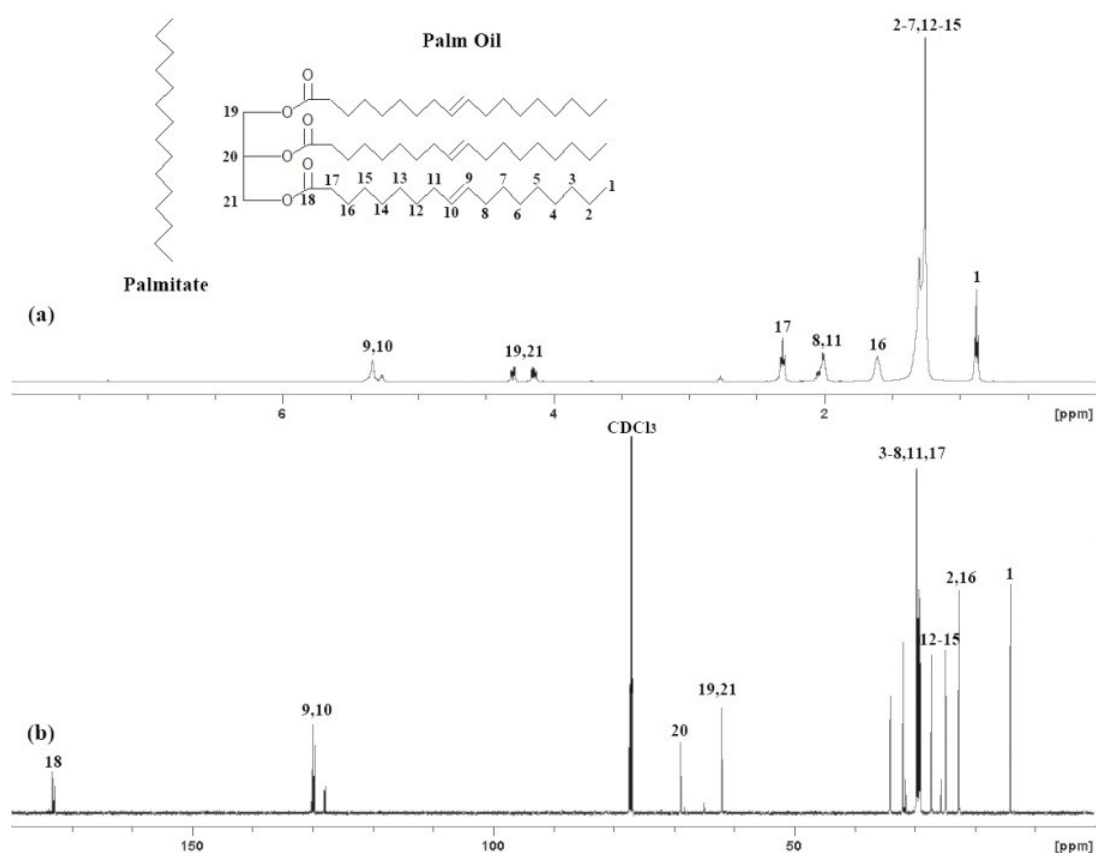

Fig. S1  $^1\text{H-NMR}$  (a) and  $^{13}\text{C-NMR}$  (b) of palm oil.

## References

1. T. E. Odetoye, D. S. Ogunniyi and G. A. Olatunji, *Ind. Crops Prod.*, 2010, 32, 225-230.
2. A. Spyros, *J. Appl. Polym. Sci.*, 2003, 88, 1881-1888.
